# Supplementary material for: An Aggregation-Induced Fluorescence Probe for Detection H2S and Its Application in Cell Imaging
Source: MDPI journal article supplement (doi:10.3390/molecules29102386), 2024-05-19
Supplement: s1 [file s1]

## Supporting Information

# An Aggregation-Induced Fluorescence Probe for Detection H<sub>2</sub>S and Its Application in Cell Imaging

Xin-Hui Tang \*, Hao-Na Zhang, Wen-Ling Wang and Qing-Ming Wang \*

School of Pharmacy, Yancheng Teachers University, Yancheng 224051, China;  
zhanghaonana2004@163.com (H.-N.Z.); wangwl@yctu.edu.cn (W.-L.W.)

\* Correspondence: xinhuitang@sina.com (X.-H.T.);  
wangqm@yctu.edu.cn (Q.-M.W.)

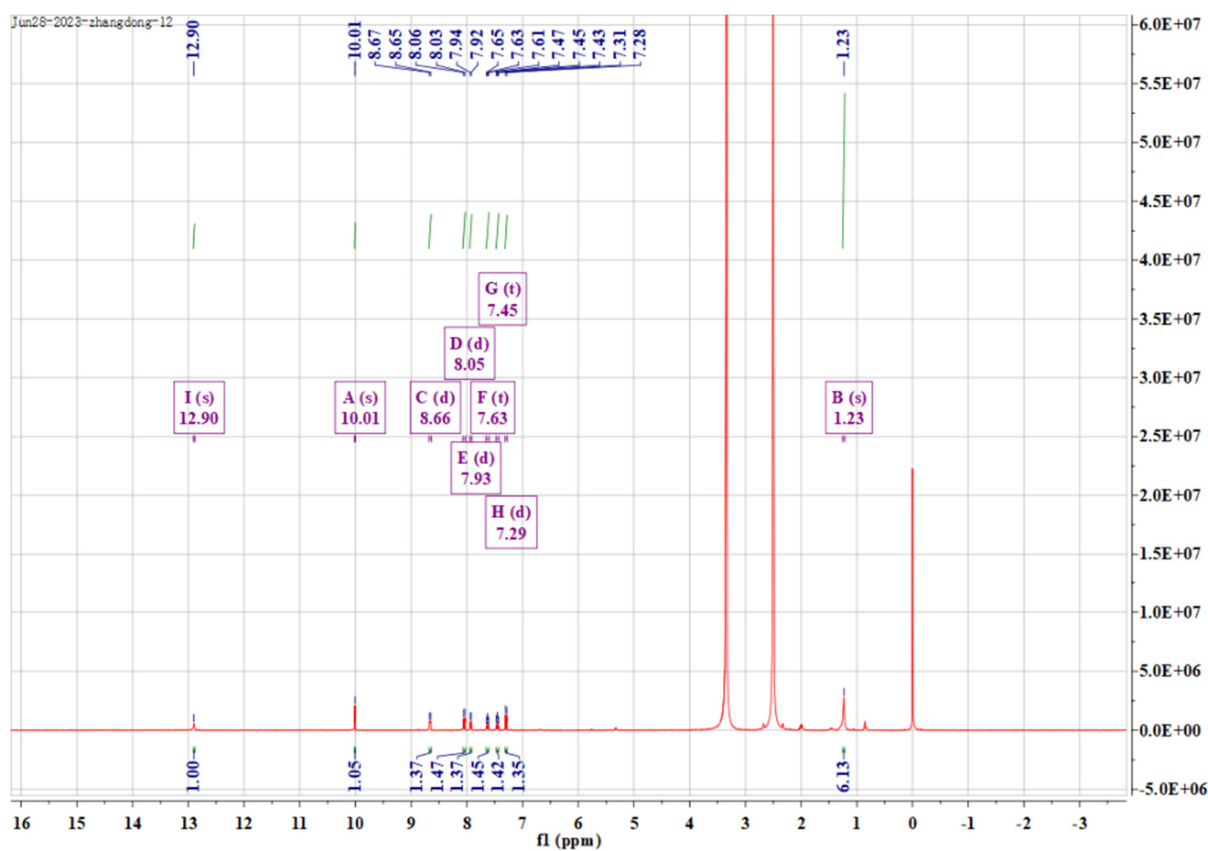

Figure S1. <sup>1</sup>H-NMR of HND.

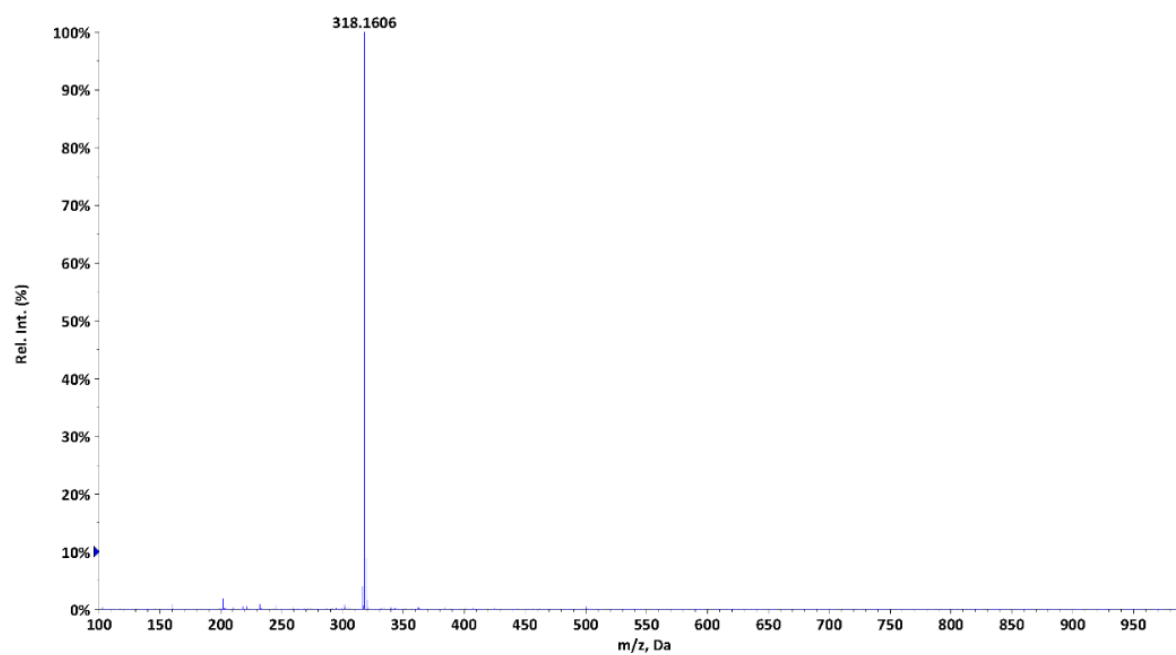

Figure S2. HR-MS of **HND**.

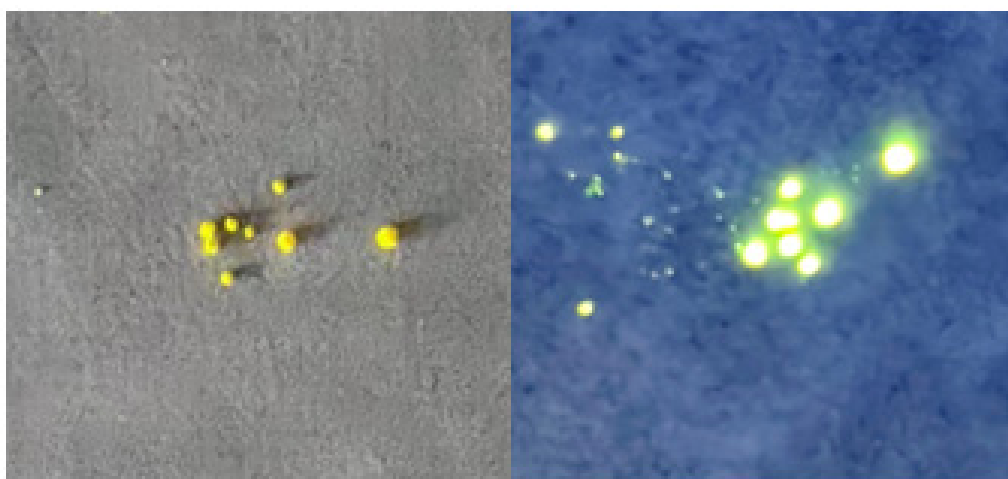

Figure S3. The color of **HND** in solid. (Right) under 365 nm UV lamp illumination; (Left) under Visible light.

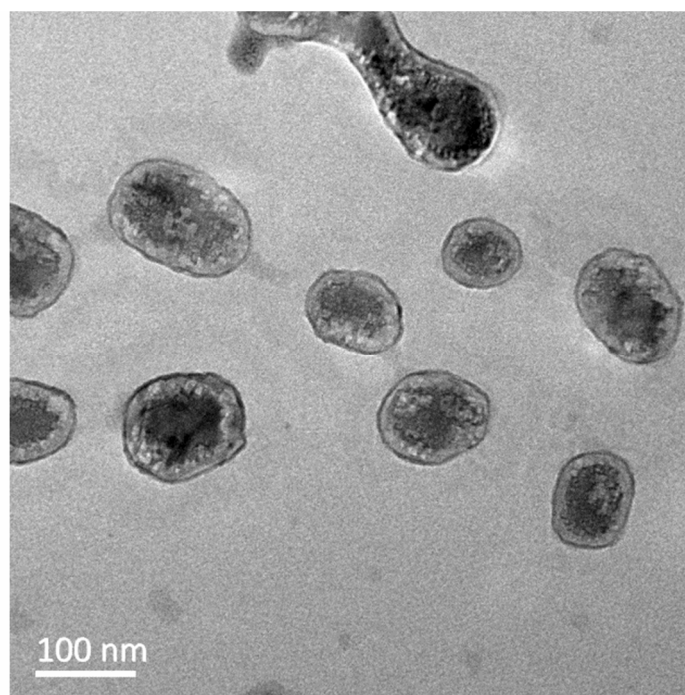

Figure S4. TEM of **HND** (5.0  $\mu\text{M}$ ) in 100% PBS.

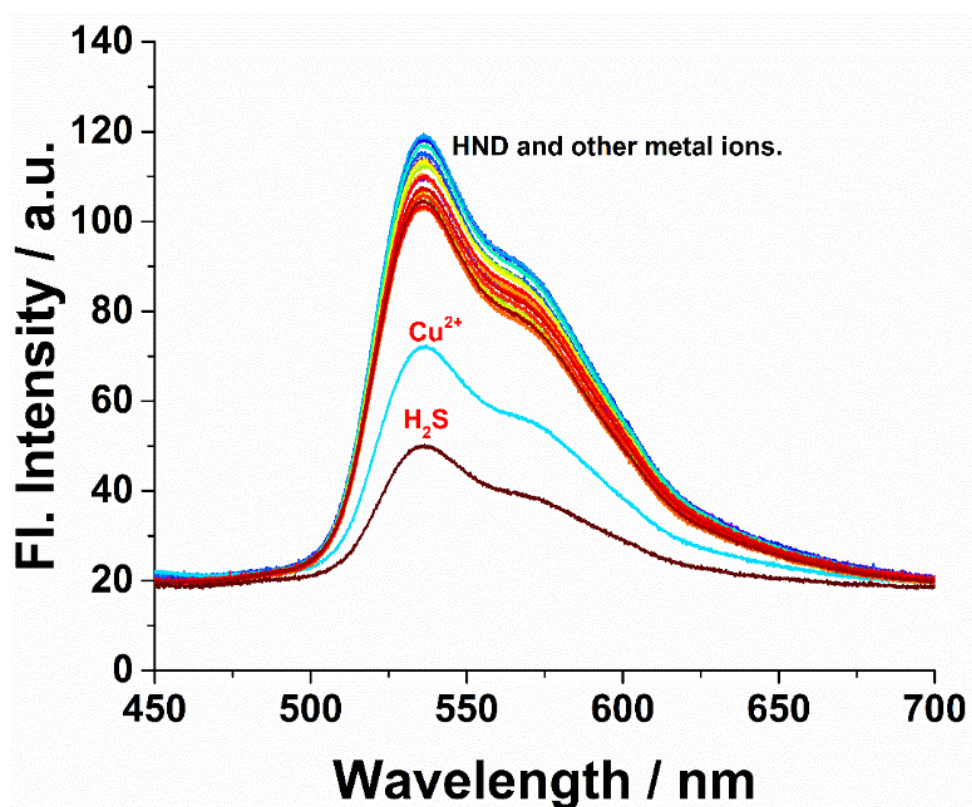

Figure S5. Selectivity profile of 5  $\mu\text{M}$  **HND** toward various of metal ions (500  $\mu\text{M}$ ) in PBS buffer (10 mM, pH 7.4),  $\lambda_{\text{ex}} = 420$  nm.

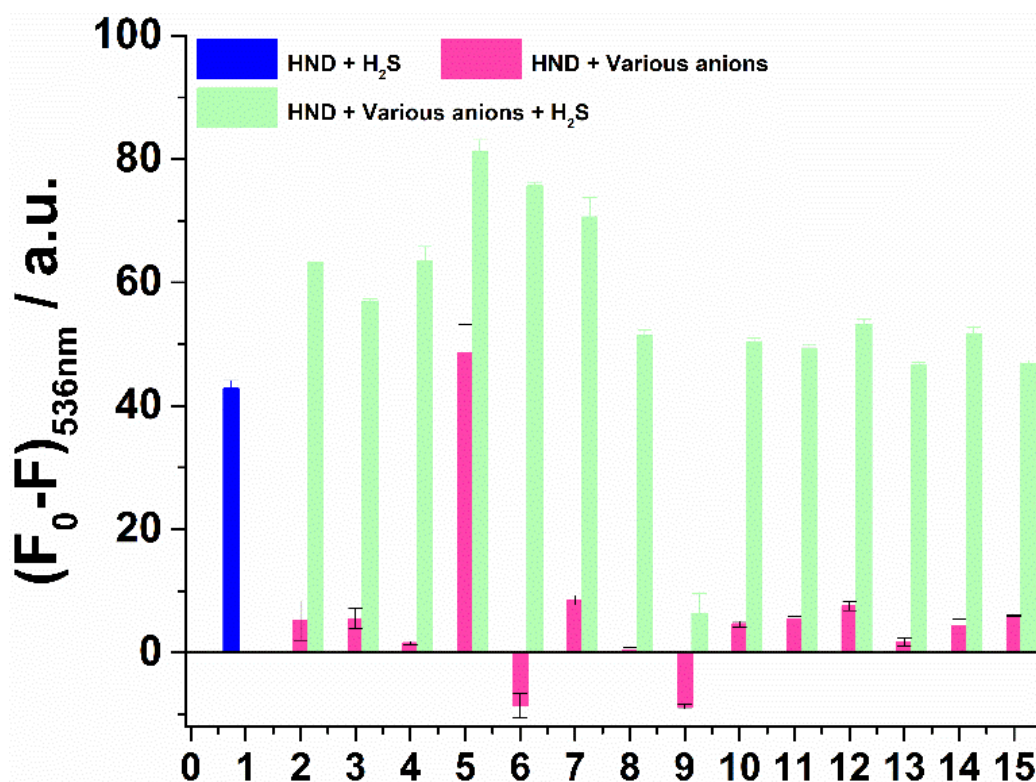

Figure S6. Fluorescence intensity changes of 5.0  $\mu\text{M}$  HND upon addition of 100 equiv.  $\text{H}_2\text{S}$  and 100 equiv. various of metal ions,  $\lambda_{\text{em}} = 536 \text{ nm}$ .

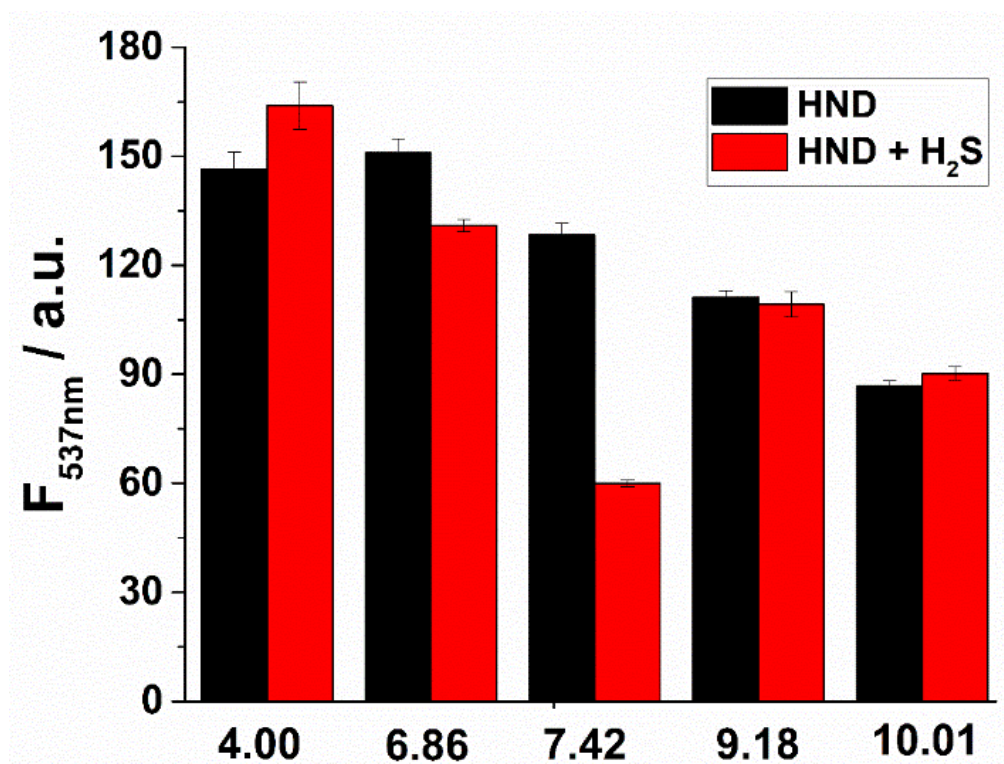

Figure S7. The pH-dependent responses of probe HND and HND to  $\text{H}_2\text{S}$ .



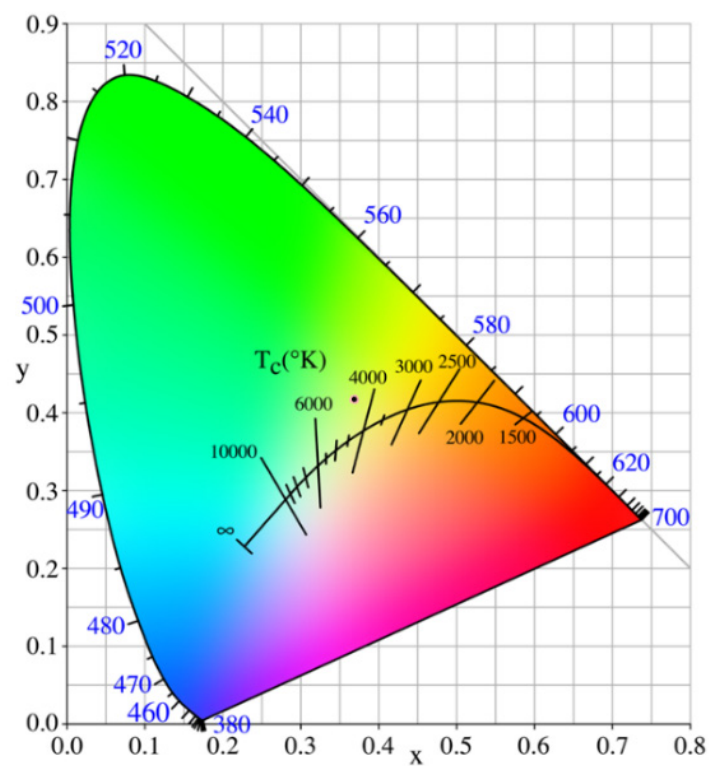

Figure S8. CIE diagram of the **HND-HS** in PBS buffer solution (10 mM, pH = 7.40).

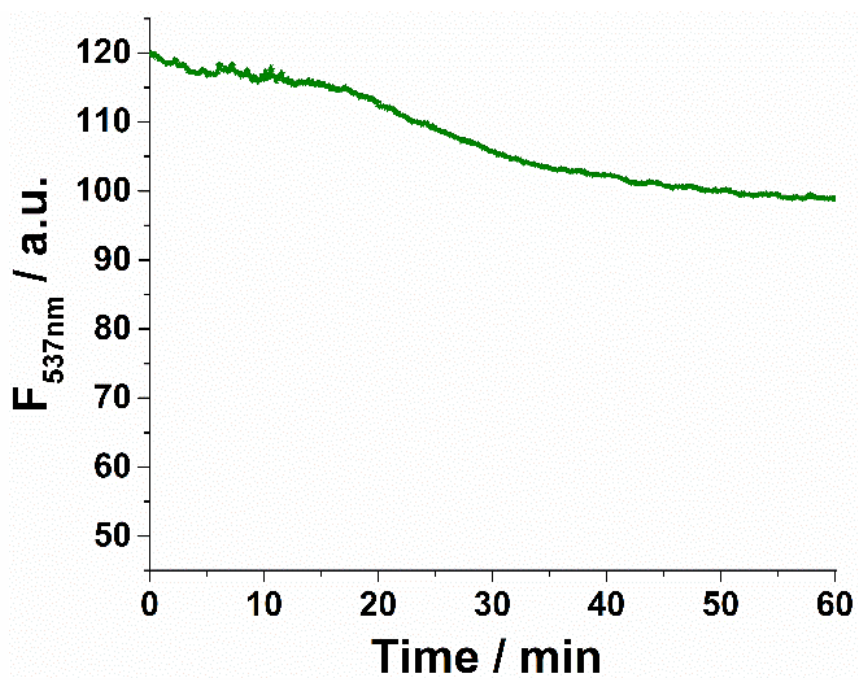

Figure S9. Time-dependent fluorescence intensity of **HND** (5.0  $\mu\text{M}$ ) in PBS( pH 7.4, 10mM).

Table S1. Comparison of **HND** for the detection of H<sub>2</sub>S.

|                                                                                     | Detection limit | Response time | Solvent                                                                              | Applications                | Ref. |
|-------------------------------------------------------------------------------------|-----------------|---------------|--------------------------------------------------------------------------------------|-----------------------------|------|
| 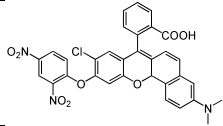   | 0.31 $\mu$ M    | 2 min         | PBS buffer (pH = 7.4)                                                                | Cell Imaging                | R1   |
|    | 0.323 $\mu$ M   | 30 s          | (pH 7.4, including 30% DMSO as cosolvent)                                            | Cell Imaging                | R2   |
|    | 0.179 $\mu$ M   | 150s          | EtOH/PBS buffer                                                                      | Hydrotalcite tablet samples | R3   |
|    | 11.2nM          | 15 min        | BR buffer solution (pH = 7.42                                                        | Cell imaging                | R4   |
|    | 0.27 $\mu$ M    | -             | PBS buffer (pH = 7.4)                                                                | Cell imaging                | R5   |
|   | 18.8nM          | -             | PBS buffer<br>(H <sub>2</sub> O/DMSO = 99:1, <i>v/v</i> )                            | Cell Imaging                | R6   |
|  | 0.116 $\mu$ M   | 120 min       | PBS buffer<br>(H <sub>2</sub> O/C <sub>2</sub> H <sub>5</sub> OH = 4:1, <i>v/v</i> ) | Cell imaging                | R7   |
|  | 8.5 $\mu$ M     | 30-60s        | PBS/CH <sub>3</sub> CN buffer (10 mM,<br>pH = 7.4, 1/1, <i>v/v</i> )                 | Cell imaging                | R8   |
| This work                                                                           | 0.61 $\mu$ M    | 1 min         | PBS buffer (pH = 7.4)                                                                | Cell imaging                |      |

R1. K. Wang, X. Yang, M.-Y. Guo, X.-Y. Chen, T. Li, R. Yan, Y.-S. Yang, H.-L. Zhu and Z.-G. Hu. Imaging the dynamic processes of hydrogen sulfide using a rapid “turn-on” mitochondria-targeting fluorescent probe. *Sensors and Actuators B: Chemical*, 2022, 369, 132285.

R2. X. Chen, D. He, X. Yang, F. Yuan, S. Yang, Y. Yang, K. Wang, J. Qian and L. Long. Construction of bifunctional fluorescent probe for two-step cascade recognition of hydrogen sulfide and biothiols in biological system. *Sensors*

and Actuators B: Chemical, 2023, 381, 133440.

- R3. X. Qin, X. Liu, J. Wang, H. Chen and X. C. Shen. A NIR ratiometric fluorescent probe for the rapid detection of hydrogen sulfide in living cells and zebrafish. *Talanta*, 2024, 266, 125043.
- R4. G. Chen, J. Xu, Z. Zhan, X. Gao, M. Jiao, M. Ren, L. Lv, T. Chen, Y. Li and Y. Liu. A bright two-photon fluorescence probe with large stokes shift for deep tissue imaging of H<sub>2</sub>S during metabolism. *Dyes and Pigments*, 2020, 172, 107850.
- R5. J. Xiong, L. Xia, Q. Huang, J. Huang, Y. Gu and P. Wang. Cyanine-based NIR fluorescent probe for monitoring H<sub>2</sub>S and imaging in living cells and in vivo. *Talanta*, 2018, 184, 109-114.
- R6. P. Ou, Y. Wang, C. Hao, Y. Peng and L. Y. Zhou. Naphthalimide-based a highly selective two-photon fluorescent probe for imaging of hydrogen sulfide in living cells and inflamed tissue of mouse model. *Spectrochim Acta A Mol Biomol Spectrosc*, 2021, 245, 118886.
- R7. C. Liu, Q. Liu, S. Cai, H. Ding, S. He, L. Zhao, X. Zeng and J. Gong. Novel near-infrared spectroscopic probe for visualizing hydrogen sulfide in lysosomes. *Spectrochim Acta A Mol Biomol Spectrosc*, 2022, 271, 120917.
- R8. Y. Du, H. Wang, T. Zhang, W. Wen, Z. Li, M. Bi and J. Liu. An ESIPT-based fluorescent probe with fast-response for detection of hydrogen sulfide in mitochondria. *Spectrochim Acta A Mol Biomol Spectrosc*, 2022, 265, 120390.
